# Supplementary material for: Optimization of an indirect method for electrocaloric effect in BT-based ceramics validated through the Rayleigh relationship and direct method
Source: Royal Society of Chemistry journal article supplement (doi:10.1039/d4tc01259c), 2024-01-01
Supplement: d4tc01259c1.pdf [file d4tc01259c1.pdf]

## Supporting Information for

### Optimization of indirect method for electrocaloric effect in BT-based ceramics validated through the Rayleigh relationship and direct method

*Kui Chen,<sup>1</sup> Jian Ma,<sup>2</sup> Bo Wu,<sup>2</sup> Peng Zhao,<sup>\*3</sup> Jingjing Chen,<sup>1</sup> Chengtao Yang<sup>\*1</sup> and  
Bin Tang<sup>\*1</sup>*

<sup>1</sup>National Engineering Center of Electromagnetic Radiation Control Materials,  
University of Electronic Science and Technology of China, Chengdu 611731, China;  
State Key Laboratory of Electronic Thin Films and Integrated Devices, School of  
Electronic Science and Engineering, University of Electronic Science and Technology  
of China, Chengdu 611731.

<sup>2</sup>Physics department, Southwest Minzu University, Chengdu 610041, P. R. China.

<sup>3</sup>College of Electronic Information and Optical Engineering, Taiyuan University of  
Technology, Taiyuan, Shanxi, 030024, China

\*Corresponding author. Email: itceozp@126.com, ctyang@uestc.edu.cn and  
tangbin@uestc.edu.cn.

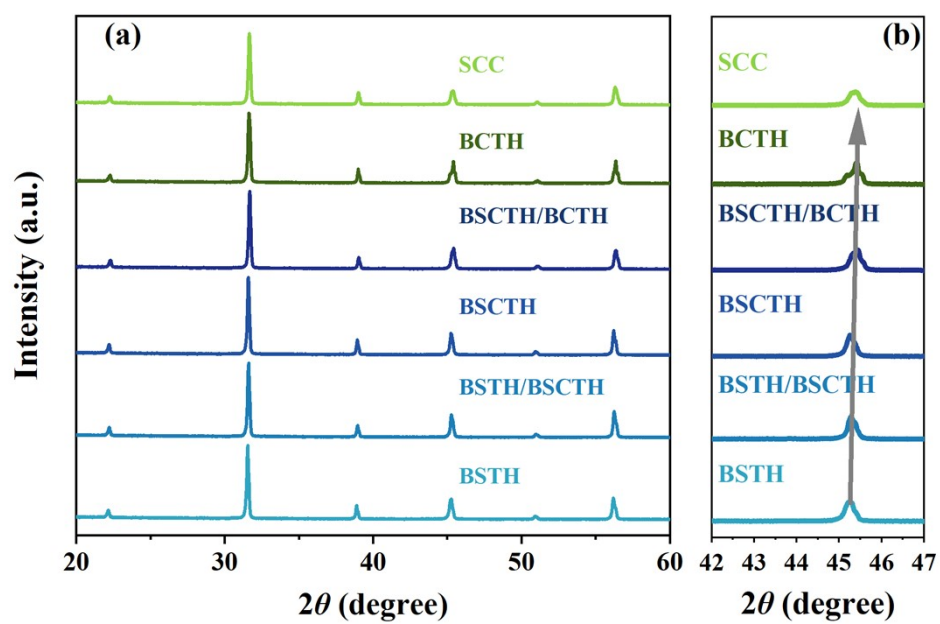

**Fig. S1** (a) The room temperature XRD patterns corresponding to BSTH, BSCTH, BCTH, SCC, and interfaces. (b) The room temperature XRD patterns correspond to enlarged patterns with  $2\theta = 42 - 47^\circ$  for BSTH, BSCTH, BCTH, SCC, and interfaces.

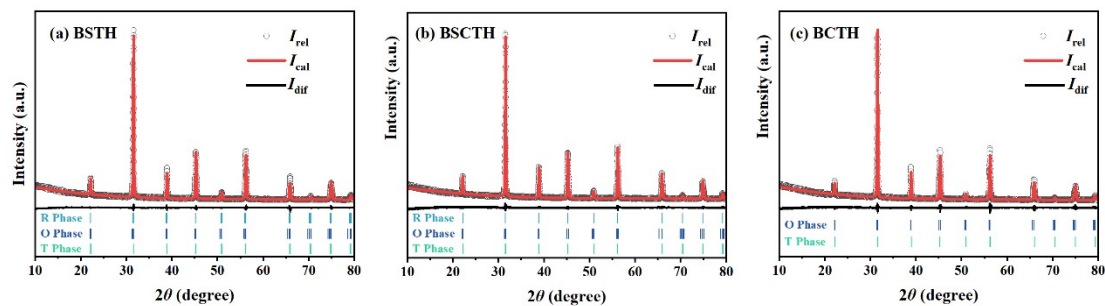

**Fig. S2** The room temperature Rietveld fitted XRD patterns corresponding amplified views for (a) BSTH, (b)BSCTH and (c)BCTH.

Table S1: Lattice parameters and refined structure parameters of BSTH, BSCTH and BCTH ceramics.

| Sample       | Space group | a (Å)  | b (Å)  | c (Å)  | Alpha(°) | Sig   | Rwp (%) |
|--------------|-------------|--------|--------|--------|----------|-------|---------|
| <b>BSTH</b>  | R3m(39.9%)  | 4.0100 | 4.0100 | 4.0100 | 89.8079  | 1.65  | 7.645   |
|              | Amm2(40.1)  | 4.0036 | 5.6640 | 5.7130 | 90       |       |         |
|              | P4mm(20.0%) | 4.0053 | 4.0053 | 4.0111 | 90       |       |         |
| <b>BSCTH</b> | R3m(49.8%)  | 4.0083 | 4.0083 | 4.0083 | 89.9944  | 1.78  | 8.056   |
|              | Amm2(39.7%) | 3.9912 | 5.6622 | 5.7127 | 90       |       |         |
|              | P4mm(10.5%) | 4.0052 | 4.0052 | 4.0100 | 90       |       |         |
| <b>BCTH</b>  | Amm2(83.5%) | 4.0014 | 4.0014 | 4.0020 | 90       | 1.788 | 8.359   |
|              | P4mm(16.5%) | 3.9997 | 5.6733 | 5.6903 | 90       |       |         |

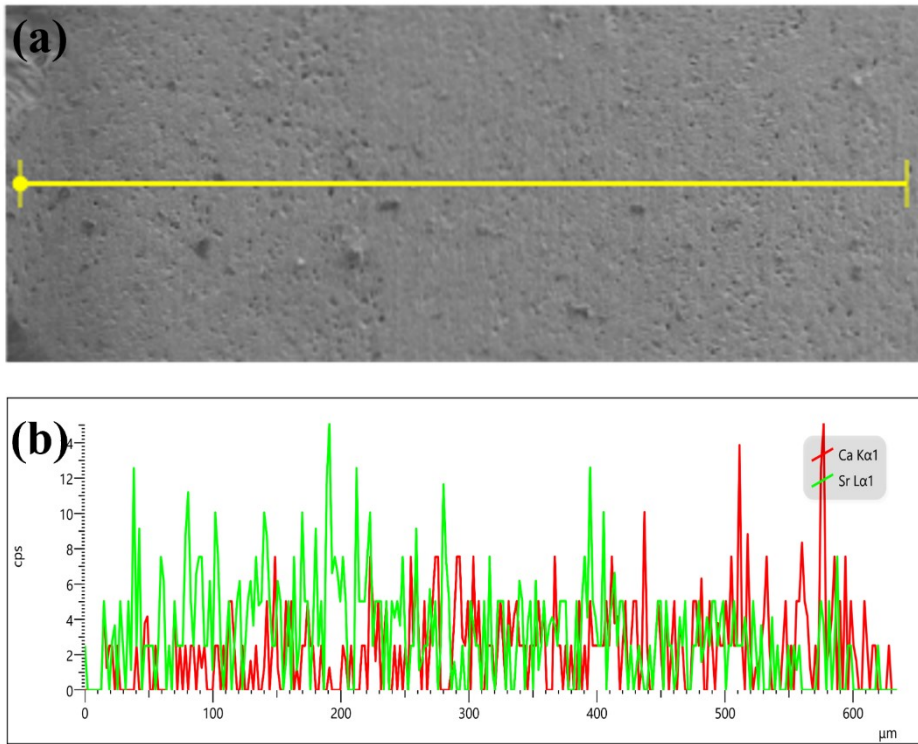

**Fig. S3** (a) FE-SEM profiles and (b) corresponding EDS line scan for SCC sample.

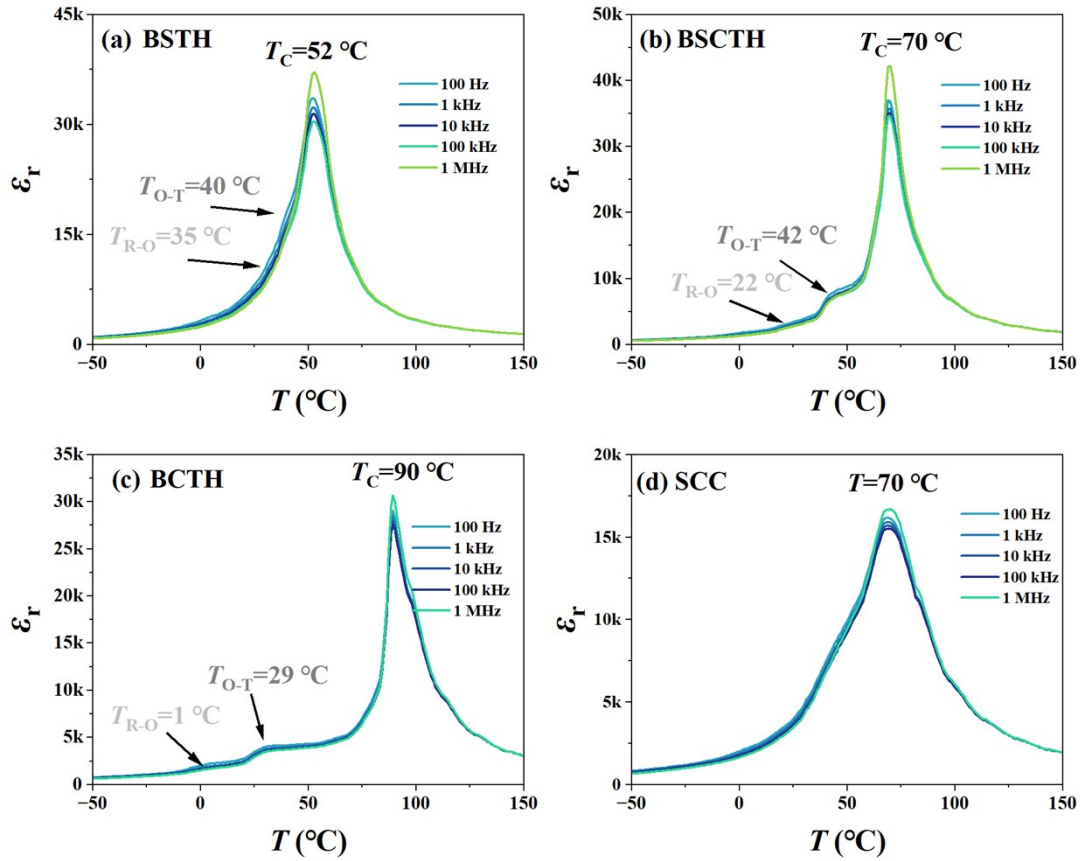

**Fig. S4** Temperature dependence of  $\epsilon_r$  at different frequency of (a) BSTH, (b) BSCTH, (c) BCTH, and (d) SCC.

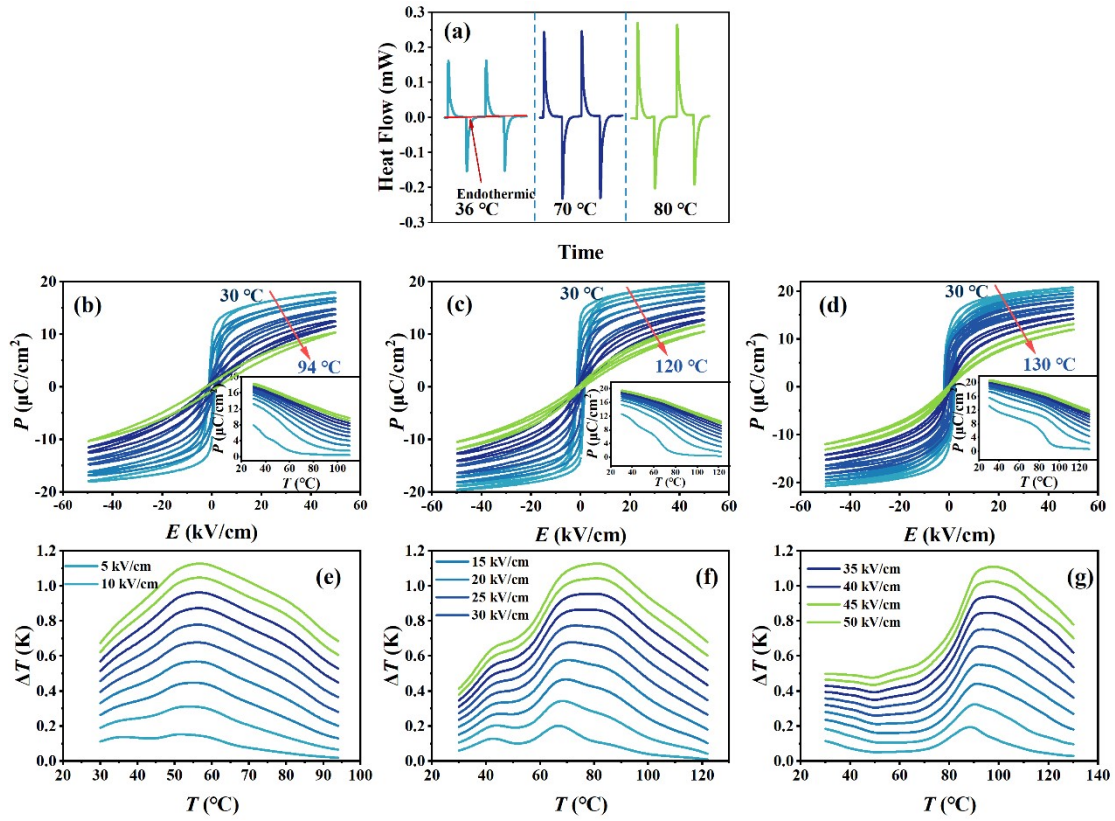

**Fig. S5** (a) DSC heat flow results at various temperatures under  $E = 20$  kV/cm for SCC. Temperature dependence of  $P$ - $E$  loops for (b) BSTH, (c) BSCTH, and (d) BCTH. The insets in (b)-(d) are the temperature dependence of polarization ( $P$ ). Temperature dependence of  $\Delta T$  for (e) BSTH, (f) BSCTH, and (g) BCTH.

Table S2: Comparison of EC properties of SCC samples and thin film materials.

| Material                                                                                       | T(K)   | $E$ (kV/cm) | $\Delta T$ (K) | Ref.      |
|------------------------------------------------------------------------------------------------|--------|-------------|----------------|-----------|
| $\text{Pb}_{0.99}\text{Nb}_{0.02}(\text{Zr}_{0.85}\text{Sn}_{0.13}\text{Ti}_{0.02})\text{O}_3$ | 323    | 139         | 5.5            | 1         |
| $\text{Pb}_{0.97}\text{La}_{0.02}(\text{Zr}_{0.75}\text{Sn}_{0.16}\text{Ti}_{0.09})\text{O}_3$ | 305    | 80          | 3.8            | 1         |
| $\text{PbZrO}_3$                                                                               | 508    | 400         | 11.4           | 2         |
| $\text{PbZr}_{0.95}\text{Ti}_{0.05}\text{O}_3$                                                 | 499    | 480         | 12             | 3         |
| 0.93PMN–0.07PT                                                                                 | 298    | 723         | 13.4           | 4         |
| 0.9PMN–0.1PT                                                                                   | 348    | 895         | 5              | 5         |
| 0.68PMN–0.32PT                                                                                 | 419    | 600         | 9              | 6         |
| SCC                                                                                            | 353.15 | 50          | 1.198          | This work |

## REFERENCES

1. X. Hao and J. Zhai, *Applied Physics Letters*, 2014, **104**.
2. J. Parui and S. B. Krupanidhi, *physica status solidi (RRL) – Rapid Research Letters*, 2008, **2**, 230-232.
3. A. S. Mischenko, Q. Zhang, J. F. Scott, R. W. Whatmore and N. D. Mathur, *Science*, 2006, **311**, 1270-1271.
4. T. M. Correia, J. S. Young, R. W. Whatmore, J. F. Scott, N. D. Mathur and Q. Zhang, *Applied Physics Letters*, 2009, **95**.
5. A. S. Mischenko, Q. Zhang, R. W. Whatmore, J. F. Scott and N. D. Mathur, *Applied Physics Letters*, 2006, **89**.
6. Z. Feng, D. Shi, R. Zeng and S. Dou, *Thin Solid Films*, 2011, **519**, 5433-5436.
